# Supplementary material
Source: publisher site journal article supplement (https://static.cambridge.org/content/id/urn:cambridge.org:id:article:S0043887116000174/resource/name/CUP_WPO_Osgood_supp_mat.pdf)
Supplement: Supplementary file 1 [file CUP_WPO_Osgood_supp_mat.pdf]

**Online Appendix:**  
The Breakdown of Industrial Opposition to Trade:  
Firms, Product Variety, and Reciprocal Liberalization

Iain Osgood

*World Politics*, Vol. 69, No. 1, January 2017  
doi: 10.1017/S00043887116000174

# Appendix A: Cases and Data

## Cases

This paper considers data from the following trade agreements and other reciprocal liberalization measures.

- Australia-US Free Trade Agreement (AUSFTA)
- Dominican Republic-Central America Free Trade Agreement (CAFTA-DR)
- Chile Free Trade Agreement
- Free Trade Agreement of the Americas (Failed)
- Jordan Free Trade Agreement
- Korea-US Free Trade Agreement (KORUS)
- U.S.-Panama Trade Agreement and U.S.-Colombia Trade Agreement (Treated jointly)
- Bahrain Free Trade Agreement; Morocco Free Trade Agreement; Oman Free Trade Agreement;
- United Arab Emirates-US Free Trade Agreement (Not ratified) (Treated jointly)
- Peru-US Trade Promotion Agreement
- Singapore-US Free Trade Agreement
- Permanent Normal Trade Relations with China
- Permanent Normal Trade Relations with Russia

## Imputed positions

A small number of association positions are imputed, because the agreement explicitly excluded liberalization of a particular industry, whether their own or a supplying upstream industry. All of these cases are listed below, and the reasoning is mentioned in brief. These cases are all associations, because they tend to occur in agricultural industries. "Oppose:ImputeFavor" implies that the association publicly opposed the agreement, but they are treated as likely supporter, should the agreement have included full liberalization.

### **Australia-US Free Trade Agreement (AUSFTA)**

National Association of Wheat Growers; Oppose:ImputeFavor

U.S. Wheat Associates; Oppose:ImputeFavor

Wheat Export Trade Education Committee; Oppose:ImputeFavor

-Australia was permitted to maintain its Wheat Board, which certain agricultural groups contended would suppress competition in the Australian market.

American Sugar Alliance; Favor:ImputeOppose

Grocery Manufacturers Association; Oppose:ImputeFavor

Australia Sugar Milling Council; Oppose:ImputeFavor

Australian Cane Farmers Association; Oppose:ImputeFavor

Australian Cane Growers Council; Oppose:ImputeFavor

Cattle Council of Australia; Oppose:ImputeFavor

-The US Sugar industry avoided substantive liberalization; "sugar was excluded from the agreement..."<sup>1</sup> The GMA opposed the agreement because sugar was excluded, and beef, to an extent.

---

<sup>1</sup> USITC. "US-Australia Free Trade Agreement: Potential Economywide and Selected Sectoral Effects." pg. xv.

The agreement "...includes no increases for imports of Australian-grown sugar and only minimal increases for beef and dairy products."<sup>2</sup>

#### **Korea-US Free Trade Agreement (KORUS)**

USA Rice Federation; Oppose:ImputeFavor

US Rice Producers Association; Oppose:ImputeFavor

Rice Millers' Association; Oppose:ImputeFavor

-The rice producing associations opposed the agreement because rice was largely excluded from the agreement. E.g. "USA Rice does not support the agreement as it stands due to the exclusion of rice. Free trade agreements entered into by the US should be comprehensive and include all products even those that are politically sensitive."<sup>3</sup>

#### **US-Peru Trade Promotion Agreement**

Travel Goods Association; Oppose:ImputeFavor

-"The Travel Goods Association (TGA) does not support the U.S.-Peru TPA. TGA states that the TPA has highly restrictive provisions on textile travel goods that prevent U.S. travel goods companies from using the best available inputs."<sup>4</sup>

### **Sales data**

Total industry receipts are taken from the US Economic Census of 2007 as a measure of industry size. 2007 is therefore used as a base year for all covariates, wherever possible. For agricultural products, data were gathered from 'QuickStats', a website created by the National Agricultural Statistics Service available at <http://quickstats.nass.usda.gov/>. The data come from the Agricultural Census of the United States. To gather the data, select: Program: Census > Sector: Economics > Group: Income > Commodity: Commodity Totals > Category: Sales > Data Item: Commodity Totals - Sales Measured in \$ > Domain: NAICS Classification. For mining products, "Products shipments or receipts for services, value (\$1,000)" are taken from the table EC0721SX1 available at [factfinder.census.gov](http://factfinder.census.gov). For manufactured products, the "Total value of shipments (\$1,000) (RCPTOT)" column is taken from the "Manufacturing: Industry Series: Detailed Statistics by Industry for the United States: 2007" from the 2007 Economic Census of the United States which is also available from [factfinder.census.gov](http://factfinder.census.gov). NAICS codes were concorded by hand from 2007 to 2012 codes to ensure complete coverage.

---

<sup>2</sup> Congressional Research Service. "Agriculture in the Australia-U.S. Free Trade Agreement". September 29 2004. <http://www.cnie.org/nle/crsreports/briefingbooks/Agriculture/Agriculture%20in%20the%20Australia-US.htm>. Accessed on: October 19 2014.

<sup>3</sup> U.S. Congress. House of Representatives. Committee on Ways and Means. 2011. The Pending Free Trade Agreements with Colombia, Panama and South Korea and the Creation of US Jobs. 112th Congress, 1st session, January 25. <http://www.gpo.gov/fdsys/pkg/CHRG-112hrg67469/html/CHRG-112hrg67469.htm> Accessed on: October 2, 2014.

<sup>4</sup> United States International Trade Commission. 2006. U.S.-Peru Trade Promotion Agreement: Potential Economy-wide and Selected Sectoral Effects. Investigation No. TA-2104-20. From USITC Website. <http://www.usitc.gov/publications/docs/pubs/2104f/pub3855.pdf> Accessed on October 7 2014. pg. 3-25.

## Tariff and trade data

The primary source for the tariff data is [wits.worldbank.org](http://wits.worldbank.org). Tariffs are at the 6-digit HS 2007 level and concorded, as averages, into 5-digit SITC Revision 4 codes. This concordance was also taken from WITS. These tariff data are also matched with corresponding trade flows data from WITS, also at the 5-digit SITC Revision 4 level. However, the main source of trade data is data gathered from Schott, Peter K. "The Relative Sophistication of Chinese Exports." *Economic Policy* 23.53 (2008): 5-49 which are available at [faculty.som.yale.edu/peterschott](http://faculty.som.yale.edu/peterschott). Import and export data from 2007 are used. Because these data use 2007 NAICS codes, some 2012 NAICS slots are miscoded or missing. A concordance is used to deal with the former. All 0 or missing trade values are filled in with SITC-based trade flows, if they are non-zero. The SITC-to-NAICS concordance was constructed by the author.

## Product differentiation

As described in the text, the Rauch (1999) coding of industries into exchange-trade products, reference-priced products, and fully differentiated products is employed here. These are measured at the SITC Revision 2.1 standard, which is concorded to SITC 4 and then into NAICS codes. The codes are available online at [www.macalester.edu/research/economics/PAGE/HAVEMAN/Trade.Resources/TradeData.html](http://www.macalester.edu/research/economics/PAGE/HAVEMAN/Trade.Resources/TradeData.html). In general, the modal differentiation code for the various SITC codes mapping into a NAICS code is used. Some codes, however, were recoded by the author to improve face validity.

The following industries were coded by the author to be Homogeneous products: "Pork", "Sugar", "Goats", "Crude Petroleum and Natural Gas Extraction", "Natural Gas Liquid Extraction", "Bituminous coal and lignite surface mining", "Bituminous coal underground mining", "Anthracite mining", "Gold ore mining", "Silver ore mining", "Lead Ore and Zinc Ore Mining", "Copper Ore and Nickel Ore Mining", "Uranium-Radium-Vanadium mining", "Rice milling", "Wet corn milling", "Soybean and oilseed processing", "Petroleum refineries", "Frozen fruit juice and vegetable", "Smelting and alloying of aluminum". (19 total)

The following industries were coded by the author to be Moderately differentiated products: "Tree Nuts", "Canned fruits and vegetables", "Specialty canning", "Spices and extracts", "Cattle ranching", "Cattle feedlots", "Dairy cattle", "Non-poultry processing", "Poultry processing", "Non-poultry processing", "Fat and oils refining", "Bottled water", "Textile bags and canvas", "Rope, cordage, tire fabric", "Sawmills", "Wood preservation", "Truss manufacturing", "Reconstituted wood product", "Engineered wood", "Wood Window and Door Manufacturing", "Cut stock resawing lumber and planing", "Other millwork", "Wood containers and pallets", "Asphalt", "Lubricants", "Plastic bottles", "Polystyrene foam", "Brick and tile manufacturing", "Flat glass", "Ready-Mix Concrete Manufacturing", "Concrete Block and Brick Manufacturing", "Concrete Pipe Manufacturing", "Other concrete products", "Gypsum Product Manufacturing", "Mineral wool", "Copper rolling, drawing and extruding", "Other non-ferrous metal foundries", "Engineered wood", "Reconstituted wood product", "Fluid milk", "Butter", "Evaporated or condensed milk", "Synthetic rubber", "Soybean and oilseed processing", "Other non-ferrous metal foundries", "Dairy cattle". (46 Total.)

The following industries were coded by the author to be Differentiated products: "Frozen specialty foods", "Confectionary", "Cheese", "Ice cream and frozen desserts", "Wineries", "Breweries", "Distilleries", "Tobacco manufacturing", "Fiber, yarn and thread", "Phosphate rocks", "Adhesives", "Surface active agents", "Custom compounding of resins", "Custom roll forming", "Powder metallurgy parts", "Dyes and pigments", "Lubricants", "Paperboard

boxes", "Wood Window and Door Manufacturing", "Laminated plastic plate sheet and shape", "Plastic pipe", "All other electronic equipment" (22 Total.)

The complete set of codings is provided below.

| No. | NAICS code | NAICS short description                    | Product differentiation |
|-----|------------|--------------------------------------------|-------------------------|
| 1   | 111110     | Soybeans                                   | Homogeneous             |
| 2   | 111120     | Oilseeds                                   | Homogeneous             |
| 3   | 111130     | Peas and Beans                             | Homogeneous             |
| 4   | 111140     | Wheat                                      | Homogeneous             |
| 5   | 111150     | Corn                                       | Homogeneous             |
| 6   | 111160     | Rice                                       | Homogeneous             |
| 7   | 111199     | Other grains                               | Homogeneous             |
| 8   | 112111     | Potatos                                    | Homogeneous             |
| 9   | 112119     | Other vegetables                           | Mod. differentiated     |
| 10  | 111310     | Oranges                                    | Mod. differentiated     |
| 11  | 111320     | Other citrus                               | Mod. differentiated     |
| 12  | 111331     | Apples                                     | Mod. differentiated     |
| 13  | 111332     | Grapes                                     | Mod. differentiated     |
| 14  | 111333     | Strawberry                                 | Mod. differentiated     |
| 15  | 111334     | Other berries                              | Mod. differentiated     |
| 16  | 111335     | Tree Nuts                                  | Mod. differentiated     |
| 17  | 111339     | Other fruit farming                        | Mod. differentiated     |
| 18  | 111411     | Mushrooms                                  | Differentiated          |
| 19  | 111421     | Nursery and tree farming                   | Differentiated          |
| 20  | 111422     | Flowers                                    | Differentiated          |
| 21  | 111910     | Tobacco                                    | Homogeneous             |
| 22  | 111920     | Cotton                                     | Homogeneous             |
| 23  | 111930     | Sugar                                      | Homogeneous             |
| 24  | 111940     | Hay                                        | Mod. differentiated     |
| 25  | 111991     | Sugar beets                                | Mod. differentiated     |
| 26  | 111992     | Peanuts                                    | Homogeneous             |
| 27  | 112111     | Cattle ranching                            | Mod. differentiated     |
| 28  | 112112     | Cattle feedlots                            | Mod. differentiated     |
| 29  | 112120     | Dairy cattle                               | Mod. differentiated     |
| 30  | 112210     | Pork                                       | Homogeneous             |
| 31  | 112310     | Eggs                                       | Mod. differentiated     |
| 32  | 112320     | Chicken                                    | Homogeneous             |
| 33  | 112330     | Turkey                                     | Homogeneous             |
| 34  | 112410     | Sheep                                      | Homogeneous             |
| 35  | 112420     | Goats                                      | Homogeneous             |
| 36  | 112910     | Apiculture                                 | Mod. differentiated     |
| 37  | 112920     | Horses and other equines                   | Differentiated          |
| 38  | 112930     | Fur-bearing animals                        | Differentiated          |
| 39  | 112990     | Other animals                              | Homogeneous             |
| 40  | 211111     | Crude Petroleum and Natural Gas Extraction | Homogeneous             |

|    |        |                                            |                     |
|----|--------|--------------------------------------------|---------------------|
| 41 | 211112 | Natural Gas Liquid Extraction              | Homogeneous         |
| 42 | 212111 | Bituminous coal and lignite surface mining | Homogeneous         |
| 43 | 212112 | Bituminous coal underground mining         | Homogeneous         |
| 44 | 212113 | Anthracite mining                          | Homogeneous         |
| 45 | 212210 | Iron ore mining                            | Homogeneous         |
| 46 | 212221 | Gold ore mining                            | Homogeneous         |
| 47 | 212222 | Silver ore mining                          | Homogeneous         |
| 48 | 212231 | Lead Ore and Zinc Ore Mining               | Homogeneous         |
| 49 | 212234 | Copper Ore and Nickel Ore Mining           | Homogeneous         |
| 50 | 212291 | Uranium-Radium-Vanadium mining             | Homogeneous         |
| 51 | 212299 | Rare earth and other metals mining         | Homogeneous         |
| 52 | 212311 | Dimensions stone mining                    | Differentiated      |
| 53 | 212312 | Crushed limestone                          | Mod. differentiated |
| 54 | 212313 | Crushed granite                            | Mod. differentiated |
| 55 | 212319 | Construction sand and gravel               | Mod. differentiated |
| 56 | 212321 | Industrial sand                            | Mod. differentiated |
| 57 | 212324 | Kaolin and ball clay                       | Mod. differentiated |
| 58 | 212325 | Clay and ceramics                          | Mod. differentiated |
| 59 | 212391 | Potash, soda, and borate mining            | Mod. differentiated |
| 60 | 212392 | Phosphate rocks                            | Differentiated      |
| 61 | 212393 | Other chemical and fertilizer mining       | Mod. differentiated |
| 62 | 311111 | Dog and cat food                           | Mod. differentiated |
| 63 | 311119 | Animal feed                                | Mod. differentiated |
| 64 | 311211 | Flour milling                              | Mod. differentiated |
| 65 | 311212 | Rice milling                               | Homogeneous         |
| 66 | 311221 | Wet corn milling                           | Homogeneous         |
| 67 | 311224 | Soybean and oilseed processing             | Mod. differentiated |
| 68 | 311225 | Fat and oils refining                      | Mod. differentiated |
| 69 | 311230 | Breakfast cereal                           | Mod. differentiated |
| 70 | 311313 | Beet sugar                                 | Homogeneous         |
| 71 | 311314 | Cane sugar                                 | Homogeneous         |
| 72 | 311340 | Confectionary                              | Differentiated      |
| 73 | 311351 | Chocolate                                  | Differentiated      |
| 74 | 311411 | Frozen fruit juice and vegetable           | Homogeneous         |
| 75 | 311412 | Frozen specialty foods                     | Differentiated      |
| 76 | 311421 | Canned fruits and vegetables               | Mod. differentiated |
| 77 | 311422 | Specialty canning                          | Mod. differentiated |
| 78 | 311423 | Dried and dehydrated food                  | Mod. differentiated |
| 79 | 311424 | Dried and dehydrated onions                | Mod. differentiated |
| 80 | 311511 | Fluid milk                                 | Mod. differentiated |
| 81 | 311512 | Butter                                     | Mod. differentiated |

|     |        |                                         |                     |
|-----|--------|-----------------------------------------|---------------------|
| 82  | 311513 | Cheese                                  | Differentiated      |
| 83  | 311514 | Evaporated or condensed milk            | Mod. differentiated |
| 84  | 311520 | Ice cream and frozen desserts           | Differentiated      |
| 85  | 311611 | Non-poultry processing                  | Mod. differentiated |
| 86  | 311612 | Meat products                           | Mod. differentiated |
| 87  | 311613 | Animal fats                             | Homogeneous         |
| 88  | 311615 | Poultry processing                      | Mod. differentiated |
| 89  | 311710 | Seafood Products                        | Mod. differentiated |
| 90  | 311811 | Retail Bakeries                         | Differentiated      |
| 91  | 311812 | Commercial Bakeries                     | Differentiated      |
| 92  | 311813 | Frozen Cakes Pies and Other Pastries    | Differentiated      |
| 93  | 311821 | Cookies and crackers                    | Differentiated      |
| 94  | 311824 | Pasta                                   | Differentiated      |
| 95  | 311830 | Tortillas                               | Mod. differentiated |
| 96  | 311911 | Roasted nuts and peanut butter          | Mod. differentiated |
| 97  | 311919 | Snack foods                             | Differentiated      |
| 98  | 311920 | Coffee and tea                          | Homogeneous         |
| 99  | 311930 | Flavoring syrups and concentrates       | Differentiated      |
| 100 | 311941 | Mayonaisse dressing and prepared sauces | Differentiated      |
| 101 | 311942 | Spices and extracts                     | Mod. differentiated |
| 102 | 311991 | Persihable food products                | Differentiated      |
| 103 | 312111 | Non-alcoholic beverages                 | Differentiated      |
| 104 | 312112 | Bottled water                           | Mod. differentiated |
| 105 | 312120 | Breweries                               | Differentiated      |
| 106 | 312130 | Wineries                                | Differentiated      |
| 107 | 312140 | Distilleries                            | Differentiated      |
| 108 | 312230 | Tobacco manufacturing                   | Differentiated      |
| 109 | 313110 | Fiber, yarn and thread                  | Differentiated      |
| 110 | 313210 | Broadwoven fabric mills                 | Differentiated      |
| 111 | 313220 | Narrow fabric and schiffli embroidery   | Differentiated      |
| 112 | 313230 | Nonwoven Fabric Mills                   | Differentiated      |
| 113 | 313240 | Knit Fabric Mills                       | Differentiated      |
| 114 | 313310 | Textile and fabric finishing            | Differentiated      |
| 115 | 313320 | Fabric coatings                         | Differentiated      |
| 116 | 314110 | Carpet and rug mills                    | Differentiated      |
| 117 | 314120 | Curtain and linen mills                 | Differentiated      |
| 118 | 314910 | Textile bags and canvas                 | Mod. differentiated |
| 119 | 314994 | Rope, cordage, tire fabric              | Mod. differentiated |
| 120 | 315110 | Hosiery and socks                       | Differentiated      |
| 121 | 315190 | Knit apparel                            | Differentiated      |
| 122 | 315210 | Cut and sew apparel contractors         | Differentiated      |



|     |        |                                       |                     |
|-----|--------|---------------------------------------|---------------------|
| 123 | 315220 | Mens cut and sew apparel              | Differentiated      |
| 124 | 315240 | Womens cut and sew apparel            | Differentiated      |
| 125 | 315280 | Uniforms                              | Differentiated      |
| 126 | 315990 | Apparel accessories                   | Differentiated      |
| 127 | 316110 | Leather and hide tanning              | Differentiated      |
| 128 | 316210 | Footwear                              | Differentiated      |
| 129 | 316992 | Leather handbags and purses           | Differentiated      |
| 130 | 316998 | All other leather goods               | Differentiated      |
| 131 | 321113 | Sawmills                              | Mod. differentiated |
| 132 | 321114 | Wood preservation                     | Mod. differentiated |
| 133 | 321211 | Hardwood veneer and plywood           | Mod. differentiated |
| 134 | 321212 | Softwood veneer and plywood           | Mod. differentiated |
| 135 | 321213 | Engineered wood                       | Mod. differentiated |
| 136 | 321214 | Truss manufacturing                   | Mod. differentiated |
| 137 | 321219 | Reconstituted wood product            | Mod. differentiated |
| 138 | 321911 | Wood Window and Door Manufacturing    | Differentiated      |
| 139 | 321912 | Cut stock resawing lumber and planing | Mod. differentiated |
| 140 | 321918 | Other millwork                        | Mod. differentiated |
| 141 | 321920 | Wood containers and pallets           | Mod. differentiated |
| 142 | 321991 | Manufactured homes                    | Differentiated      |
| 143 | 321992 | Wood buildings                        | Differentiated      |
| 144 | 321999 | Other wood products                   | Differentiated      |
| 145 | 322110 | Pulp mills                            | Mod. differentiated |
| 146 | 322121 | Paper mills                           | Mod. differentiated |
| 147 | 322122 | Newsprint mills                       | Mod. differentiated |
| 148 | 322130 | Paperboard mills                      | Mod. differentiated |
| 149 | 322211 | Corrugated and solid fiber boxes      | Mod. differentiated |
| 150 | 322212 | Paperboard boxes                      | Differentiated      |
| 151 | 322220 | Paper bags and coated papers          | Mod. differentiated |
| 152 | 322230 | Stationary products                   | Differentiated      |
| 153 | 322291 | Sanitary paper products               | Differentiated      |
| 154 | 324110 | Petroleum refineries                  | Homogeneous         |
| 155 | 324121 | Asphalt                               | Mod. differentiated |
| 156 | 324122 | Asphalt shingles                      | Mod. differentiated |
| 157 | 324191 | Lubricants                            | Differentiated      |
| 158 | 324199 | Other coke and petroleum products     | Mod. differentiated |
| 159 | 325110 | Petrochemicals                        | Mod. differentiated |
| 160 | 325120 | Industrial gases                      | Mod. differentiated |
| 161 | 325130 | Dyes and pigments                     | Differentiated      |
| 162 | 325180 | Other inorganic chemicals             | Mod. differentiated |
| 163 | 325193 | Ethyl alcohol                         | Mod. differentiated |

|     |        |                                                      |                     |
|-----|--------|------------------------------------------------------|---------------------|
| 164 | 325194 | Cyclic crudes, intermediates, gum and wood chemicals | Mod. differentiated |
| 165 | 325199 | All other basic organic chemicals                    | Mod. differentiated |
| 166 | 325211 | Plastics materials and resins                        | Mod. differentiated |
| 167 | 325212 | Synthetic rubber                                     | Mod. differentiated |
| 168 | 325220 | Synthetic fibers                                     | Mod. differentiated |
| 169 | 325311 | Nitrogenous fertilizer manufacturing                 | Mod. differentiated |
| 170 | 325312 | Phosphatic fertilizer                                | Mod. differentiated |
| 171 | 325314 | Fertilzier for mixing                                | Mod. differentiated |
| 172 | 325320 | Pesticides and agricultural chemicals                | Differentiated      |
| 173 | 325411 | Medicinal and botanicals                             | Mod. differentiated |
| 174 | 325412 | Pharmaceutical preparations                          | Differentiated      |
| 175 | 325413 | In vitro diagnostics                                 | Differentiated      |
| 176 | 325414 | Biological products                                  | Differentiated      |
| 177 | 325510 | Paint and coatings                                   | Differentiated      |
| 178 | 325520 | Adhesives                                            | Differentiated      |
| 179 | 325611 | Soap and cleaning compounds                          | Differentiated      |
| 180 | 325612 | Polish and other sanitation goods                    | Differentiated      |
| 181 | 325613 | Surface active agents                                | Differentiated      |
| 182 | 325620 | Toilet preparations                                  | Differentiated      |
| 183 | 325910 | Printing ink                                         | Differentiated      |
| 184 | 325920 | Explosives                                           | Mod. differentiated |
| 185 | 325991 | Custom compounding of resins                         | Differentiated      |
| 186 | 325992 | Photography film, paper, chemicals                   | Differentiated      |
| 187 | 326111 | Plastic bags                                         | Mod. differentiated |
| 188 | 326112 | Plastic packaging film and sheet                     | Mod. differentiated |
| 189 | 326113 | Unlaminated plastic film and sheet                   | Mod. differentiated |
| 190 | 326121 | Unlaminated plastic shapes                           | Mod. differentiated |
| 191 | 326122 | Plastic pipe                                         | Differentiated      |
| 192 | 326130 | Laminated plastic plate sheet and shape              | Differentiated      |
| 193 | 326140 | Polystyrene foam                                     | Mod. differentiated |
| 194 | 326150 | Urethane products                                    | Mod. differentiated |
| 195 | 326160 | Plastic bottles                                      | Mod. differentiated |
| 196 | 326191 | Plastic plumbing fixtures                            | Differentiated      |
| 197 | 326199 | Other plastic products                               | Differentiated      |
| 198 | 326211 | Tire manufacturing                                   | Differentiated      |
| 199 | 326220 | Rubber and plastic hoses and belting                 | Differentiated      |
| 200 | 326291 | Rubbers goods for mechanical applications            | Differentiated      |
| 201 | 326299 | All other rubber products                            | Differentiated      |
| 202 | 327110 | Pottery, ceramics, and plumbing fixture              | Differentiated      |
| 203 | 327120 | Brick and tile manufacturing                         | Mod. differentiated |
| 204 | 327211 | Flat glass                                           | Mod. differentiated |

|     |        |                                                              |                     |
|-----|--------|--------------------------------------------------------------|---------------------|
| 205 | 327212 | Pressed, blown glass and glassware                           | Differentiated      |
| 206 | 327213 | Glass containers                                             | Differentiated      |
| 207 | 327215 | Glass products made of purchased glass                       | Differentiated      |
| 208 | 327310 | Cement                                                       | Mod. differentiated |
| 209 | 327320 | Ready-Mix Concrete Manufacturing                             | Mod. differentiated |
| 210 | 327331 | Concrete Block and Brick Manufacturing                       | Mod. differentiated |
| 211 | 327332 | Concrete Pipe Manufacturing                                  | Mod. differentiated |
| 212 | 327390 | Other concrete products                                      | Mod. differentiated |
| 213 | 327410 | Lime manufacturing                                           | Mod. differentiated |
| 214 | 327420 | Gypsum Product Manufacturing                                 | Mod. differentiated |
| 215 | 327910 | Abrasive products                                            | Differentiated      |
| 216 | 327991 | Cut stone and stone products                                 | Differentiated      |
| 217 | 327992 | Ground or treated minerals or earth                          | Mod. differentiated |
| 218 | 327993 | Mineral wool                                                 | Mod. differentiated |
| 219 | 331110 | Iron and Steel Mills                                         | Mod. differentiated |
| 220 | 331210 | Steel and Iron Pipe                                          | Differentiated      |
| 221 | 331221 | Rolled steel shapes                                          | Mod. differentiated |
| 222 | 331222 | Steel Wire                                                   | Differentiated      |
| 223 | 331313 | Aluminum refining                                            | Homogeneous         |
| 224 | 331314 | Smelting and alloying of aluminum                            | Homogeneous         |
| 225 | 331315 | Aluminum sheet plate and foil                                | Mod. differentiated |
| 226 | 331318 | Other aluminum rolling drawing extruding                     | Mod. differentiated |
| 227 | 331410 | Nonferrous metal smelting and refining                       | Homogeneous         |
| 228 | 331420 | Copper rolling, drawing and extruding                        | Mod. differentiated |
| 229 | 331491 | Nonferrous metal rolling drawing and extruding               | Differentiated      |
| 230 | 331492 | Secondary smelting alloying and refining of nonferrous metal | Homogeneous         |
| 231 | 331511 | Iron foundries                                               | Differentiated      |
| 232 | 331512 | Steel investment foundries                                   | Differentiated      |
| 233 | 331513 | Other steel foundries                                        | Mod. differentiated |
| 234 | 331523 | Non-ferrous metal die-casting                                | Mod. differentiated |
| 235 | 331524 | Aluminum foundries                                           | Mod. differentiated |
| 236 | 331529 | Other non-ferrous metal foundries                            | Mod. differentiated |
| 237 | 332111 | Iron and steel forging and stamping                          | Mod. differentiated |
| 238 | 332114 | Custom roll forming                                          | Differentiated      |
| 239 | 332117 | Powder metallurgy parts                                      | Differentiated      |
| 240 | 332119 | Metal crowns closures and other stamping                     | Differentiated      |
| 241 | 332215 | Cutlery and metal cookware                                   | Differentiated      |
| 242 | 332216 | Handtools                                                    | Differentiated      |
| 243 | 332311 | Metal buildings and components                               | Differentiated      |
| 244 | 332312 | Fabricated structural metal                                  | Differentiated      |
| 245 | 332313 | Metal plate work                                             | Differentiated      |

|     |        |                                                       |                     |
|-----|--------|-------------------------------------------------------|---------------------|
| 246 | 332321 | Metal windows and doors                               | Differentiated      |
| 247 | 332322 | Sheet metal work                                      | Differentiated      |
| 248 | 332323 | Architectural metal work                              | Differentiated      |
| 249 | 332410 | Boilers                                               | Differentiated      |
| 250 | 332420 | Metal tanks                                           | Differentiated      |
| 251 | 332431 | Metal cans, boxes and containers                      | Differentiated      |
| 252 | 332439 | Other metal containers                                | Differentiated      |
| 253 | 332510 | Hardware                                              | Differentiated      |
| 254 | 332613 | Springs                                               | Differentiated      |
| 255 | 332618 | Other wire products                                   | Differentiated      |
| 256 | 332710 | Machine shops                                         | Mod. differentiated |
| 257 | 332721 | Turned products                                       | Mod. differentiated |
| 258 | 332722 | Bolt, nut, screw and rivet manufacturing              | Differentiated      |
| 259 | 332911 | Industrial valves                                     | Differentiated      |
| 260 | 332912 | Fluid power valves                                    | Differentiated      |
| 261 | 332913 | Plumbing fixture and trims                            | Differentiated      |
| 262 | 332919 | Other metal valves                                    | Differentiated      |
| 263 | 332991 | Ball and roller bearings                              | Differentiated      |
| 264 | 332992 | Small arms ammunition                                 | Differentiated      |
| 265 | 332993 | Other ammunition                                      | Differentiated      |
| 266 | 332994 | Small arms                                            | Differentiated      |
| 267 | 332996 | Fabricated pipe and pipe fittings                     | Differentiated      |
| 268 | 333111 | Farm machinery                                        | Differentiated      |
| 269 | 333112 | Lawn and Garden Equipment                             | Differentiated      |
| 270 | 333120 | Construction machinery                                | Differentiated      |
| 271 | 333131 | Mining machinery                                      | Differentiated      |
| 272 | 333132 | Oil and gas field machinery                           | Differentiated      |
| 273 | 333241 | Food product machinery                                | Differentiated      |
| 274 | 333242 | Semiconductor machinery                               | Differentiated      |
| 275 | 333243 | Sawmill, woodworking and paper machinery              | Differentiated      |
| 276 | 333244 | Printing machinery and equipment                      | Differentiated      |
| 277 | 333248 | Textile machinery                                     | Differentiated      |
| 278 | 333249 | Plastics machinery                                    | Differentiated      |
| 279 | 333314 | Optical instrument and lens manufacturing             | Differentiated      |
| 280 | 333316 | Photographic and photocopying equipment manufacturing | Differentiated      |
| 281 | 333318 | Other commercial and service industry machinery       | Differentiated      |
| 282 | 333413 | Fan and blower and air purification equipment         | Differentiated      |
| 283 | 333414 | Heating equipment                                     | Differentiated      |
| 284 | 333415 | Air-conditioning and refrigeration equipment          | Differentiated      |
| 285 | 333511 | Industrial molds                                      | Differentiated      |
| 286 | 333514 | Special dies, tools, jigs                             | Differentiated      |

|     |        |                                                   |                |
|-----|--------|---------------------------------------------------|----------------|
| 287 | 333515 | Cutting tools and machine accessories             | Differentiated |
| 288 | 333517 | Machine tools                                     | Differentiated |
| 289 | 333519 | Rolling mill and other metalworking machinery     | Differentiated |
| 290 | 333611 | Turbines and turbine generators                   | Differentiated |
| 291 | 333612 | Speed changers, drives, gears                     | Differentiated |
| 292 | 333613 | Mechanical power transmission                     | Differentiated |
| 293 | 333618 | Engines, except auto and aircraft                 | Differentiated |
| 294 | 333911 | Pumps and pumping equipment                       | Differentiated |
| 295 | 333912 | Air and gas compressors                           | Differentiated |
| 296 | 333913 | Measuring and dispensing pumps                    | Differentiated |
| 297 | 333921 | Elevators and escalators                          | Differentiated |
| 298 | 333922 | Conveyors                                         | Differentiated |
| 299 | 333923 | Overhead cranes and hoists                        | Differentiated |
| 300 | 333924 | Industrial trucks                                 | Differentiated |
| 301 | 333991 | Power tools                                       | Differentiated |
| 302 | 333992 | Welding equipment                                 | Differentiated |
| 303 | 333993 | Packaging machinery                               | Differentiated |
| 304 | 333994 | Industrial process furnace and ovens              | Differentiated |
| 305 | 333995 | Fluid power cylinder and actuators                | Differentiated |
| 306 | 333996 | Fluid power pump and motor                        | Differentiated |
| 307 | 333997 | Scales and balances                               | Differentiated |
| 308 | 334111 | Computers                                         | Differentiated |
| 309 | 334112 | Computer storage devices                          | Differentiated |
| 310 | 334118 | Computer terminals and other peripheral equipment | Differentiated |
| 311 | 334210 | Telephone apparatus                               | Differentiated |
| 312 | 334220 | Radio, television and wireless equipment          | Differentiated |
| 313 | 334290 | Other communications equipment                    | Differentiated |
| 314 | 334310 | Audio and visual equipment                        | Differentiated |
| 315 | 334412 | Circuit boards                                    | Differentiated |
| 316 | 334413 | Semiconductors                                    | Differentiated |
| 317 | 334416 | Capacitors, resistors, transformers               | Differentiated |
| 318 | 334417 | Electronic connector                              | Differentiated |
| 319 | 334418 | Printed circuit assembly                          | Differentiated |
| 320 | 334419 | Other electronic components                       | Differentiated |
| 321 | 334510 | Electromedical apparatus                          | Differentiated |
| 322 | 334511 | Navigational systems and instruments              | Differentiated |
| 323 | 334512 | Environmental controls                            | Differentiated |
| 324 | 334513 | Instruments for industrial control                | Differentiated |
| 325 | 334514 | Fluid meters and counting devices                 | Differentiated |
| 326 | 334515 | Electricity measuring instruments                 | Differentiated |
| 327 | 334516 | Analytical lab instruments                        | Differentiated |

|     |        |                                             |                     |
|-----|--------|---------------------------------------------|---------------------|
| 328 | 334517 | Irradiation equipment                       | Differentiated      |
| 329 | 334519 | Watches and clocks                          | Differentiated      |
| 330 | 334613 | Blank magnetic and optical recording media  | Differentiated      |
| 331 | 334614 | Software and recording reproducing          | Differentiated      |
| 332 | 335110 | Light bulbs                                 | Differentiated      |
| 333 | 335121 | Residential light fixtures                  | Differentiated      |
| 334 | 335122 | Commercial and industrial lighting          | Differentiated      |
| 335 | 335129 | Other lighting equipment                    | Differentiated      |
| 336 | 335210 | Small electrical appliances                 | Differentiated      |
| 337 | 335221 | Cooking appliances                          | Differentiated      |
| 338 | 335222 | Refrigerators and freezers                  | Differentiated      |
| 339 | 335224 | Household laundry equipment                 | Differentiated      |
| 340 | 335228 | Other household appliances                  | Differentiated      |
| 341 | 335311 | Power distribution equipment                | Differentiated      |
| 342 | 335312 | Electrical motor and generators             | Differentiated      |
| 343 | 335313 | Electrical switchboards and switchgears     | Differentiated      |
| 344 | 335314 | Relay and industrial control                | Differentiated      |
| 345 | 335911 | Storage batteries                           | Mod. differentiated |
| 346 | 335912 | Primary batteries                           | Mod. differentiated |
| 347 | 335921 | Fiber optic cable                           | Differentiated      |
| 348 | 335929 | Other communications and energy wire        | Differentiated      |
| 349 | 335931 | Current-carrying wiring devices             | Differentiated      |
| 350 | 335932 | Non-current carrying wiring devices         | Differentiated      |
| 351 | 335991 | Carbon and graphite products                | Differentiated      |
| 352 | 335999 | All other electronic equipment              | Differentiated      |
| 353 | 336111 | Autos                                       | Differentiated      |
| 354 | 336112 | Light trucks                                | Differentiated      |
| 355 | 336120 | Heavy duty trucks                           | Differentiated      |
| 356 | 336211 | Motor vehicle bodies                        | Differentiated      |
| 357 | 336212 | Truck trailers                              | Differentiated      |
| 358 | 336213 | Motor homes                                 | Differentiated      |
| 359 | 336214 | Travel trailer and campers                  | Differentiated      |
| 360 | 336310 | Motor vehicle engine parts                  | Differentiated      |
| 361 | 336320 | Motor vehicle electrical parts              | Differentiated      |
| 362 | 336330 | Motor vehicle steering and suspension parts | Differentiated      |
| 363 | 336340 | Motor vehicle brake systems                 | Differentiated      |
| 364 | 336350 | Motor vehicle transmissions                 | Differentiated      |
| 365 | 336360 | Motor vehicle seating and interior trim     | Differentiated      |
| 366 | 336370 | Motor vehicle metal stamping                | Differentiated      |
| 367 | 336390 | Other motor vehicle parts                   | Differentiated      |
| 368 | 336411 | Aircraft manufacturing                      | Differentiated      |

|     |        |                                    |                |
|-----|--------|------------------------------------|----------------|
| 369 | 336412 | Aircraft engines and parts         | Differentiated |
| 370 | 336413 | Aircraft parts                     | Differentiated |
| 371 | 336414 | Guided missile and space vehicles  | Differentiated |
| 372 | 336415 | Space vehicle propulsion systems   | Differentiated |
| 373 | 336419 | Other space vehicle parts          | Differentiated |
| 374 | 336510 | Railroad rolling stock             | Differentiated |
| 375 | 336611 | Ship building                      | Differentiated |
| 376 | 336612 | Boat building                      | Differentiated |
| 377 | 336991 | Motorcycles                        | Differentiated |
| 378 | 336992 | Armored vehicles                   | Differentiated |
| 379 | 337110 | Kitchen cabinets and countertops   | Differentiated |
| 380 | 337121 | Upholstered household furniture    | Differentiated |
| 381 | 337122 | Nonupholstered wood furniture      | Differentiated |
| 382 | 337124 | Metal household                    | Differentiated |
| 383 | 337125 | Other household furniture          | Differentiated |
| 384 | 337127 | Institutional furniture            | Differentiated |
| 385 | 337211 | Wood office furniture              | Differentiated |
| 386 | 337212 | Custom architectural woodwork      | Differentiated |
| 387 | 337214 | Office furniture except wood       | Differentiated |
| 388 | 337215 | Partitions shelving and lockers    | Differentiated |
| 389 | 337910 | Mattresses                         | Differentiated |
| 390 | 337920 | Blinds and shades                  | Differentiated |
| 391 | 339112 | Surgical and medical instruments   | Differentiated |
| 392 | 339113 | Surgical appliances and supplies   | Differentiated |
| 393 | 339114 | Dental equipment and supplies      | Differentiated |
| 394 | 339115 | Ophthalmic equipment               | Differentiated |
| 395 | 339910 | Jewelry and silverware             | Differentiated |
| 396 | 339920 | Sporting and athletic goods        | Differentiated |
| 397 | 339930 | Dolls toys and games               | Differentiated |
| 398 | 339940 | Non-paper office supplies          | Differentiated |
| 399 | 339950 | Signs manufacturing                | Differentiated |
| 400 | 339991 | Gaskets and seals                  | Differentiated |
| 401 | 339992 | Musical instruments                | Differentiated |
| 402 | 339993 | Fasteners buttons needles and pins | Differentiated |
| 403 | 339994 | Brooms brushes and mops            | Differentiated |
| 404 | 339995 | Burial caskets                     | Differentiated |

The Broda and Weinstein (2006) estimates of the elasticity of substitution estimates are available at <http://www.columbia.edu/~dew35/TradeElasticities/TradeElasticities.html>.

## FDI data

Data on foreign direct investment by the United States at the country level is only publicly available at a relatively high level of aggregation, usually the two- or three-digit NAICS code. There is however data on worldwide FDI by American businesses at the four-digit NAICS level. I assume that (potential) US FDI in the agreement countries is distributed similarly to US FDI worldwide within three-digit industries, in order to construct a four-digit NAICS measure of potential FDI in each market. The measure is at the four-digit level (indexed by  $j$ ) but employs data at the two-digit level (indexed by  $i$  where  $j \in i$ ).

$$\text{FDI potential}_j = \text{DIA}_i^{US,Partner} \cdot \frac{\text{DIA}_j^{US}}{\sum_j \text{DIA}_j^{US}}.$$

Each of these figures is taken from the US Direct Investment Abroad Tables produced by the Bureau of Economic Analysis.

In the case of two country-groups, there is no data broken down by industry whatsoever. In these cases, regional FDI is used to distribute total US FDI into 2- and 3-digit NAICS industries. These cases are: Jordan (total Middle East US Direct Investment Abroad is used); United Arab Emirates/Bahrain/Oman/Morocco (UAE-US DIA; and all 'other' Middle Eastern countries outside Saudi Arabia and Israel).

Data on related-party imports are taken from the US Census Bureau "NAICS Related-Party" page at <http://sasweb.ssd.census.gov/relatedparty/>. Data from 2007 is employed, as elsewhere.

For the decomposition of trade into inter-industry, vertical and horizontal components, I have used the decomposition approach from Fontagné and Freudenberg (1997), using the BACI data from CEPII Gaulier and Zignago (2010). I followed the decomposition strategy used in Manger (2014), that is, one-way trade occurs where one country's bilateral exports exceeds the other country's by a factor of 10. Then, vertical intra-industry trade occurs where the implied unit value of the goods traded differ by more than 25% between the trade partners. To concord this into the NAICS coding scheme, I use a percentage approach. What percentage of the trade flows between the US and South Korea, for example, in NAICS industry 321111 occur on 6-digit tariff lines characterized by HIIT, VIIT, or inter-industry trade? The mean HIIT across all industries and agreements is .0812 while the mean VIIT is .4395.

## Number of associations and association resources

The number of associations per industry is based simply on the database of associations generated for this project. Each association is counted as one per industry, even if it spans multiple industries. The associations budget information is taken from Gale's Associations Unlimited (Hedblad, 2003). Association budgets are available for only 227 of 540 associations examined in this paper.

## Number of enterprises

The data on the number of enterprises for the agriculture industries comes from Table 46 of the Census of Agriculture 2007, using the column "Farms". See [http://www.agcensus.usda.gov/Publications/2007/Full\\_Report/Volume\\_1,\\_Chapter\\_1\\_US/st99\\_1\\_046\\_046.pdf](http://www.agcensus.usda.gov/Publications/2007/Full_Report/Volume_1,_Chapter_1_US/st99_1_046_046.pdf). The number of enterprises for mining and manufacturing are taken from the 2012 Economic Census, in order to avoid concordancing for



these supplemental controls.

### **Measures of industrial concentration**

The measure of 4-firm and 20-firm concentration come from the Economic Census available at [factfinder.census.gov](http://factfinder.census.gov). The title of the document is "Concentration Ratios: Share of Industry Statistics for Companies Ranked by Value Added: 2012". 2012 data are again employed to avoid concordancing. For the agricultural industries, an approach was developed using data from "Farms by Concentration of Market Value of Agricultural Products Sold" from the 2007 Agricultural Census available at [http://www.agcensus.usda.gov/Publications/2007/Full\\_Report/Volume\\_1,\\_Chapter\\_1\\_US/st99\\_1\\_040\\_040.pdf](http://www.agcensus.usda.gov/Publications/2007/Full_Report/Volume_1,_Chapter_1_US/st99_1_040_040.pdf). This document provides information on the number of farms controlling the top 10, 25, 50 and 75% of sales in each agricultural industry (although some at a level of aggregation higher than 6-digits.) My approach was to assume that each farm within those groups is equally size. So if, 8 farms control 10% of agricultural production of peanuts, than the 4-firm concentration ratio is 5%, for example. Clearly, this number puts a lower bound on the concentration ratio, but is plausible as a first cut. Note that concentration ratios are generally very small in farming.

## **Appendix B: Models with Alternative Measures**

This section consider a series of robustness checks using alternative measures for the main variables. In particular, the Rauch (1999) product differentiation measure is replaced with the elasticity of substitution; the 5-point comparative advantage proxy based on net exports is replaced with a 5-point measure based on revealed comparative advantage.

|                                                                   | Support for agreement |           |         |             |          |            |
|-------------------------------------------------------------------|-----------------------|-----------|---------|-------------|----------|------------|
|                                                                   | All                   | Kor/Aus   | All     | Kor/Aus     | All      | Kor/Aus    |
| <u>Effect of differentiation conditional on net-exports:</u>      |                       |           |         |             |          |            |
| Net-importing × Homogeneous → Mod. differentiated                 | 4.82                  | 4.24      | -0.12   | 5.54        | -0.50    | 8.28*      |
| × Homogeneous → Differentiated                                    | 14.81***              | 23.68**   | -0.18   | 8.59        | -0.78    | 12.93*     |
| Balanced trade × Homogeneous → Mod. differentiated                | -2.51                 | -12.67*   | -0.32   | -0.43       | -0.38    | -0.10      |
| × Homogeneous → Differentiated                                    | 1.31                  | -15.89**  | -0.49   | -0.67       | -0.59    | -0.15      |
| Net-exporting × Homogeneous → Mod. differentiated                 | -11.41***             | -18.56**  | -0.52   | -5.95       | -0.25    | -7.61      |
| × Homogeneous → Differentiated                                    | -13.73***             | -43.44*** | -0.81   | -9.36       | -0.39    | -12.16     |
| <u>Effect of relative exports conditional on differentiation:</u> |                       |           |         |             |          |            |
| Homogeneous × Relative exports: Low → High                        | 22.30***              | 55.98***  | -0.79   | 18.64*      | 2.23     | 31.39***   |
| Mod. differen. × Relative exports: Low → High                     | 6.19                  | 33.02**   | -1.20   | 7.10        | 2.51     | 15.43**    |
| Differentiated × Relative exports: Low → High                     | -6.10**               | -11.13    | -1.38   | 0.59        | 2.67     | 6.15       |
| <u>Other covariates:</u>                                          |                       |           |         |             |          |            |
| FDI potential                                                     | 8.95***               | 0.75      | 8.52*** | -1.35       | 8.92***  | -0.68      |
| Imported inputs                                                   | 9.47***               | 9.04**    | 9.87*** | 7.41**      | 10.30*** | 8.05**     |
| Downstream exports                                                | 0.65                  | 0.64      | 0.68    | 1.16        | 0.68     | 1.16       |
| Sales                                                             | 9.71***               | 14.74***  | 8.71*** | 12.77***    | 8.45***  | 12.63***   |
| Sample size                                                       | 4836                  | 806       | 4692    | 782         | 4692     | 782        |
| Proxy for Comp. Adv.                                              |                       | RCA       |         | Net exports |          | RCA        |
| Proxy for Prod. Diff.                                             |                       | Rauch     |         | Elasticity  |          | Elasticity |

Notes: All estimates are first differences from a multinomial logistic regression; changes in continuous variables are from median to 90th percentile except relative exports, which is 10th percentile to median, and median to 90th percentile. \*\*\* $p < 0.01$ , \*\* $p < 0.05$ , \* $p < 0.10$ .

Table B1: Replication of models in Table 3 using alternative proxies for comparative advantage and product differentiation.

| Outcome:                          | KORUS/AUSFTA |         |            |           | All        | Kor/Aus    | All        |
|-----------------------------------|--------------|---------|------------|-----------|------------|------------|------------|
|                                   | Oppose       | Divided | Favor      | No pos.   | Divided    | Both happy | Both happy |
| Abs. Elasticity: High → Moderate  | -0.67        | -0.24   | 1.65       | -0.32     | 0.95       | 3.99       | 3.63       |
| Abs. Elasticity: High → Low       | -0.97        | -0.41   | 2.39       | -0.61     | 1.46       | 6.27       | 5.69       |
| Relative exports: Low → Moderate  | -11.72***    | -2.63   | 6.58       | 8.68**    | -12.06***  | -4.83      | -4.09      |
| Relative exports: Moderate → High | -0.78        | -8.86*  | 19.36**    | -9.79**   | -4.32      | -17.81**   | -23.49***  |
| FDI potential                     | -0.54**      | -2.35*  | 5.10**     | -2.26*    | -5.73***   | 3.31*      | 20.24***   |
| Imported inputs                   | -0.73        | -0.29   | -4.61      | 5.64*     | 8.29**     | 11.15**    | -7.02**    |
| Downstream exports                | 0.13         | 1.31    | -0.32      | -1.20     | 1.16       | 0.43       | 0.18       |
| Sales                             | 0.18         | 11.08** | 3.64       | -15.20*** | 1.65       | 7.66**     | 11.83***   |
| Sample size                       |              |         | 782        |           | 4692       | 782        | 4692       |
| Proxy for Comp. Adv.              |              |         | RCA        |           | RCA        | RCA        | RCA        |
| Proxy for Prod. Diff.             |              |         | Elasticity |           | Elasticity | Elasticity | Elasticity |

Notes: All estimates are first differences from a multinomial logistic regression; changes in continuous variables are from median to 90th percentile except for the comparative advantage proxy, which is 10th percentile to median. \*\*\*  $p < 0.01$ , \*\*  $p < 0.05$ , \*  $p < 0.10$ .

Table B2: Replication of models in Table 4 using alternative proxies for comparative advantage and product differentiation.

|                                   | Firms take<br>positions only | Associations take<br>positions only | Firms<br>lobby only | Association(s)<br>lobby only | Both<br>lobby |
|-----------------------------------|------------------------------|-------------------------------------|---------------------|------------------------------|---------------|
| Abs. Elasticity: High → Moderate  | 3.13*                        | -3.07                               | 2.95                | -3.01*                       | 2.97**        |
| Abs. Elasticity: High → Low       | 5.13*                        | -4.87                               | 4.64                | -4.46*                       | 4.80**        |
| Relative exports: Low → Moderate  | 10.50***                     | 0.22                                | 7.13**              | -3.57                        | -9.64***      |
| Relative exports: Moderate → High | -4.50                        | -0.09                               | -1.20               | -0.88                        | 1.72          |
| FDI potential                     | -6.45***                     | -2.67                               | -3.58               | -5.62***                     | 3.03          |
| Imported inputs                   | 6.73**                       | -7.61***                            | 5.06**              | -1.18                        | -1.84         |
| Downstream exports                | 1.51*                        | -0.02                               | -1.43**             | 1.02                         | 0.54          |
| Sales                             | 2.71                         | -17.37***                           | 7.48***             | -6.81***                     | 7.50***       |
| Sample size                       | 1800                         | 1800                                | 1463                | 1463                         | 1463          |
| LRT p-value                       | .00***                       | .00***                              | .00***              | .00***                       | .00***        |

Notes: All estimates are first differences from logistic regression models; changes in continuous variables are from median to 90th percentile except for the comparative advantage proxy, which is 10th percentile to median. \*\*\*  $p < 0.01$ , \*\*  $p < 0.05$ , \*  $p < 0.10$ .

Table B3: Replication of models in Table 5 using alternative proxies for comparative advantage and product differentiation.

## **Appendix C: Models with Alternative and Additional Controls**

This section considers a series of robustness checks including additional controls. These are: the measures of associational resources (number of establishments which requires dropping some missing observations, and number of associations); and the 4- and 20-firm concentration ratios (which require excluding the mining industries). Finally, the FDI potential variable is replaced with the related-party imports of the United States and supplemented with the measures of horizontal and vertical intra-industry trade.

|                                                                   | Support for agreement |           |
|-------------------------------------------------------------------|-----------------------|-----------|
|                                                                   | All                   | Kor/Aus   |
| <u>Effect of differentiation conditional on net-exports:</u>      |                       |           |
| Net-importing × Homogeneous → Mod. differentiated                 | 0.29                  | 15.03     |
| × Homogeneous → Differentiated                                    | 13.97**               | 36.02**   |
| Balanced trade × Homogeneous → Mod. differentiated                | -12.81***             | -18.69**  |
| × Homogeneous → Differentiated                                    | -3.91                 | -12.64    |
| Net-exporting × Homogeneous → Mod. differentiated                 | -29.52***             | -29.94*** |
| × Homogeneous → Differentiated                                    | -26.16***             | -38.54*** |
| <u>Effect of relative exports conditional on differentiation:</u> |                       |           |
| Homogeneous × Relative exports: Low → High                        | 38.34***              | 62.82***  |
| Mod. differen. × Relative exports: Low → High                     | 8.55**                | 16.98     |
| Differentiated × Relative exports: Low → High                     | -1.79                 | -12.06    |
| <u>Other covariates:</u>                                          |                       |           |
| Related-party Imports                                             | 11.85***              | 2.85*     |
| Imported inputs                                                   | 11.75***              | 7.42**    |
| Downstream exports                                                | 0.05                  | -0.42     |
| Sales                                                             | 4.17**                | 12.18**   |
| Assoc. budgets                                                    | 21.47***              | 19.82***  |
| Num. assocs.                                                      | -1.75                 | -13.18*   |
| Num. establishments                                               | 0.93***               | 1.92**    |
| 4-firm concentration                                              | 0.59                  | -3.21     |
| 20-firm concentration                                             | 4.27                  | 2.06      |
| Pct. HIIT                                                         | 4.80***               | -16.13*** |
| Pct. VIIT                                                         | 5.21***               | -5.68*    |
| Sample size                                                       | 4512                  | 752       |

Notes: All estimates are first differences from a multinomial logistic regression; changes in continuous variables are from median to 90th percentile except relative exports, which is 10th percentile to median, and median to 90th percentile. \*\*\*  $p < 0.01$ , \*\*  $p < 0.05$ , \*  $p < 0.10$ .

Table C1: Replication of Table 3 with additional control variables.

| Outcome:                          | KORUS/AUSFTA |           |           |           | All       | Kor/Aus    | All        |
|-----------------------------------|--------------|-----------|-----------|-----------|-----------|------------|------------|
|                                   | Oppose       | Divided   | Favor     | No pos.   | Divided   | Both happy | Both happy |
| Homogeneous → Mod. differentiated | -2.34        | 3.07      | -14.54*   | 14.30**   | 2.23      | 12.48      | 12.43      |
| Homogeneous → Differentiated      | -3.17*       | 12.32**   | -13.58*   | 5.06      | 8.80**    | 27.57**    | 25.81**    |
| Relative costs: Low → Moderate    | -4.15***     | -22.66*** | 26.98***  | 0.79      | -17.51*** | -3.82      | -2.69      |
| Relative costs: Moderate → High   | -0.81**      | -4.39     | 5.18*     | 0.18      | 3.65      | -15.12***  | -22.35***  |
| Related-party Imports             | -0.40**      | -3.50**   | 4.74**    | -0.69     | -3.71**   | 3.39       | 19.34***   |
| Imported inputs                   | 0.27         | -0.15     | -5.29     | 4.84*     | 9.16**    | 9.42*      | -9.61**    |
| Downstream exports                | 0.02         | 0.78      | -0.91     | 0.01      | 0.50      | 0.23       | 0.44       |
| Sales                             | -0.53        | 9.82*     | -0.20     | -9.07***  | -1.23     | 15.76**    | 20.80***   |
| Assoc. budgets                    | 0.50         | 26.34***  | -16.26*** | -10.54*** | 27.21***  | 11.77**    | 11.59***   |
| Num. assocs.                      | 1.14         | 1.02      | -7.66     | 3.69      | 1.61      | -23.66***  | -21.07***  |
| Num. establishments               | -0.25***     | 1.07      | -0.12     | -0.71**   | -0.39     | 2.91***    | 1.31*      |
| 4-firm concentration              | -0.91        | -12.22*** | 4.16      | 9.25*     | -8.36***  | -17.32*    | -16.89**   |
| 20-firm concentration             | 0.91         | 16.05     | -12.45    | -6.20**   | 13.86**   | 5.55       | 3.64       |
| Pct. HIIT                         | 0.89         | -10.21**  | -1.26     | 10.22**   | -3.89*    | -10.96     | 3.96       |
| Pct. VIIT                         | 0.52         | 8.82**    | -13.50*** | 3.70*     | 4.49*     | -0.73      | 5.04       |
| Sample size                       |              |           | 752       |           | 4512      | 752        | 4512       |

Notes: All estimates are first differences from a multinomial logistic regression; changes in continuous variables are from median to 90th percentile except for the comparative advantage proxy, which is 10th percentile to median. \*\*\*  $p < 0.01$ , \*\*  $p < 0.05$ , \*  $p < 0.10$ .

Table C2: Replication of models in Table 4 with additional control variables.



|                                   | Firms take<br>positions only | Associations take<br>positions only | Firms<br>lobby only | Association(s)<br>lobby only | Both<br>lobby |
|-----------------------------------|------------------------------|-------------------------------------|---------------------|------------------------------|---------------|
| Homogeneous → Mod. differentiated | 1.09                         | -8.48                               | -4.70               | 3.46                         | 9.46**        |
| Homogeneous → Differentiated      | 15.31***                     | -28.58***                           | 4.03                | 0.67                         | 13.92***      |
| Relative costs: Low → Moderate    | 9.37***                      | 1.93                                | 9.99**              | -2.86*                       | -12.83***     |
| Relative costs: Moderate → High   | -1.89                        | -3.24                               | -4.19               | 2.72                         | 4.77          |
| Related-party Imports             | -6.95***                     | -1.79                               | -3.19               | -0.04                        | 0.55**        |
| Imported inputs                   | 3.78                         | -0.10                               | 2.74                | 0.11                         | -4.38**       |
| Downstream exports                | 3.63***                      | -2.58***                            | -0.04               | -0.23                        | 1.48*         |
| Sales                             | 7.97**                       | -21.27***                           | 12.65***            | -4.24***                     | 9.70***       |
| Assoc. budgets                    | -10.68***                    | 6.27***                             | -17.22***           | 6.24***                      | 4.67**        |
| Num. assoc.                       | -4.49                        | 12.53**                             | 4.10                | 0.26                         | -1.30         |
| Num. establishments               | -1.07***                     | 0.67*                               | -0.06               | 0.04                         | 0.49          |
| 4-firm concentration              | -4.39                        | 9.32*                               | -2.57               | 6.05**                       | -12.29***     |
| 20-firm concentration             | 0.94                         | -4.21                               | 14.17**             | -3.56***                     | 18.31***      |
| Pct. HIIT                         | -1.36                        | -1.67                               | -1.87               | 1.02                         | 1.69          |
| Pct. VIIT                         | 0.79                         | -3.96**                             | 2.28                | 0.73                         | 1.82          |
| Sample size                       | 1774                         | 1774                                | 1435                | 1435                         | 1438          |

Notes: All estimates are first differences from logistic regression models; changes in continuous variables are from median to 90th percentile except for the comparative advantage proxy, which is 10th percentile to median. \*\*\*  $p < 0.01$ , \*\*  $p < 0.05$ , \*  $p < 0.10$ .

Table C3: Replication of models in Table 5 using alternative covariates.

## Appendix D: Models among Manufacturing Industries Only

|                                                                   | Support for agreement |          |
|-------------------------------------------------------------------|-----------------------|----------|
|                                                                   | All                   | Kor/ Aus |
| <u>Effect of differentiation conditional on net-exports:</u>      |                       |          |
| Net-importing × Homogeneous → Mod. differentiated                 | 6.79                  | 23.83    |
| × Homogeneous → Differentiated                                    | 15.74**               | 32.92*   |
| Balanced trade × Homogeneous → Mod. differentiated                | 2.73                  | 3.89     |
| × Homogeneous → Differentiated                                    | 8.66**                | 1.64     |
| Net-exporting × Homogeneous → Mod. differentiated                 | -1.62                 | -15.36   |
| × Homogeneous → Differentiated                                    | 1.37                  | -29.11   |
| <u>Effect of relative exports conditional on differentiation:</u> |                       |          |
| Homogeneous × Relative exports: Low → High                        | 6.47                  | 38.56    |
| Mod. differen. × Relative exports: Low → High                     | -1.99                 | -0.16    |
| Differentiated × Relative exports: Low → High                     | -7.89**               | -22.69** |
| <u>Other covariates:</u>                                          |                       |          |
| FDI potential                                                     | 14.80***              | 4.21**   |
| Imported inputs                                                   | 6.41***               | 4.14     |
| Downstream exports                                                | 0.35                  | 0.50     |
| Sales                                                             | 10.27***              | 17.02*** |
| Sample size                                                       | 4104                  | 684      |
| LRT p-value                                                       | .00***                | .00***   |

Notes: All estimates are first differences from a multinomial logistic regression; changes in continuous variables are from median to 90th percentile except relative exports, which is 10th percentile to median, and median to 90th percentile. \*\*\*  $p < 0.01$ , \*\*  $p < 0.05$ , \*  $p < 0.10$ .

Table D1: Replication of Table 3 using manufacturing industries only.

| Outcome:                          | KORUS/AUSFTA |           |         |           | All       | Kor/Aus    | All        |
|-----------------------------------|--------------|-----------|---------|-----------|-----------|------------|------------|
|                                   | Oppose       | Divided   | Favor   | No pos.   | Divided   | Both happy | Both happy |
| Homogeneous → Mod. differentiated | -2.76**      | 3.86**    | 2.09    | -2.07     | 3.21**    | 12.74      | 13.45      |
| Homogeneous → Differentiated      | -4.08**      | 10.72*    | 0.32    | -5.42     | 8.34**    | 16.88      | 19.25*     |
| Imp-competing → Balanced trade    | -1.77**      | -19.19*** | 17.59** | 3.98      | -19.25*** | -7.66      | -2.25      |
| Balanced trade → Export-competing | -0.74*       | -5.70*    | 3.12    | 3.24      | 2.05      | -12.14***  | -24.79***  |
| FDI potential                     | -0.48***     | -2.50*    | 6.98*** | -3.95***  | -4.96**   | 2.61       | 15.44***   |
| Imported inputs                   | 0.43         | -4.15     | -4.20   | 7.81**    | 6.44*     | 6.59       | -8.43**    |
| Downstream exports                | -0.03        | 1.83*     | -1.11   | -0.79     | 1.92*     | 1.28       | 1.81       |
| Sales                             | -0.38        | 11.64**   | 2.66    | -13.94*** | -0.34     | 13.62**    | 16.46***   |
| Sample size                       |              | 684       |         |           | 4104      | 684        | 4104       |

Notes: All estimates are first differences from a multinomial logistic regression; changes in continuous variables are from median to 90th percentile except for the comparative advantage proxy, which is 10th percentile to median. \*\*\*  $p < 0.01$ , \*\*  $p < 0.05$ , \*  $p < 0.10$ .

Table D2: Replication of Table 4 using manufacturing industries only.

|                                   | Firms take<br>positions only | Assocs. take<br>positions only | Firms<br>lobby only | Association(s)<br>lobby only | Both<br>lobby |
|-----------------------------------|------------------------------|--------------------------------|---------------------|------------------------------|---------------|
| Homogeneous → Mod. differentiated | -8.98**                      | 18.59**                        | -5.94               | 13.32***                     | 11.42***      |
| Homogeneous → Differentiated      | 13.72**                      | -5.28                          | 7.17                | 8.22**                       | 13.35***      |
| Imp-competing → Balanced trade    | 12.14***                     | 1.19                           | 8.72**              | -3.52                        | -10.81***     |
| Balanced trade → Export-competing | 1.69                         | -5.70                          | -4.95               | -1.84                        | 2.64          |
| FDI potential                     | -8.87***                     | -2.77                          | -2.93               | -0.96                        | 0.41**        |
| Imported inputs                   | 7.93**                       | -1.74                          | 3.57                | -0.11                        | -3.93**       |
| Downstream exports                | 4.51***                      | -2.60***                       | -1.44*              | -0.03                        | 1.77**        |
| Sales                             | 1.48                         | -17.12***                      | 9.56***             | -6.48***                     | 10.95***      |
| Sample size                       | 1609                         | 1609                           | 1443                | 1403                         | 1443          |

Notes: All estimates are first differences from logistic regression models; changes in continuous variables are from median to 90th percentile except for the comparative advantage proxy, which is 10th percentile to median. \*\*\*  $p < 0.01$ , \*\*  $p < 0.05$ , \*  $p < 0.10$ .

Table D3: Replication of Table 5 using manufacturing industries only.

|                                   | Firms take positions only | Assocs. take positions only | Firms lobby only | Association(s) lobby only | Both lobby |
|-----------------------------------|---------------------------|-----------------------------|------------------|---------------------------|------------|
| Homogeneous → Mod. differentiated | 6.30***                   | -14.32***                   | 5.99***          | 1.52                      | 4.32***    |
| Homogeneous → Differentiated      | 25.18***                  | -30.76***                   | 13.26***         | 3.27                      | 10.55***   |
| Imp-competing → Balanced trade    | 11.89***                  | 1.39                        | 7.83**           | -3.36                     | -10.13***  |
| Balanced trade → Export-competing | 1.29                      | -5.68                       | -4.22            | -2.44                     | 2.25       |
| FDI potential                     | -9.03***                  | -2.64                       | -3.23            | -1.14                     | 0.37*      |
| Imported inputs                   | 8.33**                    | -2.07                       | 3.65             | -0.10                     | -3.96***   |
| Downstream exports                | 4.25***                   | -2.34**                     | -1.47*           | 0.04                      | 1.97**     |
| Sales                             | 1.69                      | -16.83***                   | 9.41***          | -6.77***                  | 10.87***   |
| Sample size                       | 1616                      | 1616                        | 1446             | 1446                      | 1446       |

*Notes:* All estimates are first differences from logistic regression models; changes in continuous variables are from median to 90th percentile except for the comparative advantage proxy, which is 10th percentile to median. \*\*\*  $p < 0.01$ , \*\*  $p < 0.05$ , \*  $p < 0.10$ .

Table D4: Replication of Table 5 using manufacturing industries only. The Rauch (1999) measure of product differentiation is operationalized as an ordinal rather than a factor variable for this set of robustness checks owing to the limited number of 'Homogeneous' good industries among manufacturers only.

## Appendix E: Additional Subset Analyses

This section considers two alternative subset analyses. The first excludes the two extensions of PNTR and the Free Trade Agreement of the Americas, which never secured final passage. The second subset includes only 6 select PTAs with countries of sufficient economic size and heterogeneity: Australia, CAFTA-DR, Chile, Colombia/Panama, Peru, and South Korea. We investigate whether the results are, in the main, similar in these groups and so are not being driven, for example, by non-FTAs or idiosyncratic FTAs that were not driven primarily by diplomatic or strategic considerations. The results look very similar to those presented in the main text.

|                                                                   | Support for agreement |               |
|-------------------------------------------------------------------|-----------------------|---------------|
|                                                                   | FTAs in force         | Select 6 FTAs |
| <u>Effect of differentiation conditional on net-exports:</u>      |                       |               |
| Net-importing × Homogeneous → Mod. differentiated                 | 10.38**               | 11.83*        |
| × Homogeneous → Differentiated                                    | 13.38**               | 16.66**       |
| Balanced trade × Homogeneous → Mod. differentiated                | -6.68**               | -7.87**       |
| × Homogeneous → Differentiated                                    | -4.82                 | -7.23*        |
| Net-exporting × Homogeneous → Mod. differentiated                 | -25.95***             | -27.81***     |
| × Homogeneous → Differentiated                                    | -25.09***             | -30.94***     |
| <u>Effect of relative exports conditional on differentiation:</u> |                       |               |
| Homogeneous × Relative exports: Low → High                        | 29.59***              | 35.65***      |
| Mod. differen. × Relative exports: Low → High                     | -6.69                 | -3.81         |
| Differentiated × Relative exports: Low → High                     | -8.76***              | -11.78***     |
| <u>Other covariates:</u>                                          |                       |               |
| FDI potential                                                     | 14.10***              | 12.58***      |
| US input reliance                                                 | 14.00***              | 5.09**        |
| US output reliance                                                | 0.97*                 | 1.32**        |
| Sales                                                             | 4.69***               | 11.04***      |
| Sample size                                                       | 3627                  | 2418          |

Notes: All estimates are first differences from a multinomial logistic regression; changes in continuous variables are from median to 90th percentile except relative exports, which is 10th percentile to median, and median to 90th percentile. \*\*\*  $p < 0.01$ , \*\*  $p < 0.05$ , \*  $p < 0.10$ .

Table E1: Replication of Table 5 excluding Russia and China PNTR, and the Free Trade Agreement of the Americas; and then additionally excluding the FTAs with Middle Eastern states and Singapore.

| Outcome:                          | Select 6 FTAs |           |           |           | In force  | Select 6   | In force   |
|-----------------------------------|---------------|-----------|-----------|-----------|-----------|------------|------------|
|                                   | Oppose        | Divided   | Favor     | No pos.   | Divided   | Both happy | Both happy |
| Homogeneous → Mod. differentiated | -2.25         | 8.32**    | -12.50**  | 6.77*     | 7.66**    | 3.88       | 2.48       |
| Homogeneous → Differentiated      | -3.46*        | 14.53**   | -14.63*** | 3.96      | 11.30**   | 9.83**     | 4.73       |
| Import-competing → Balanced trade | -4.45**       | -20.81*** | 17.28***  | 8.67**    | -18.00*** | -6.81*     | -5.95*     |
| Balanced trade → Export-competing | -1.70         | 3.64      | -1.97     | -0.12     | 3.90      | -13.97***  | -9.15***   |
| FDI potential                     | 1.16          | -3.97     | 10.84***  | -8.04***  | -3.37     | 24.00***   | 21.85***   |
| US input reliance                 | -0.53         | -4.60     | 2.28      | 3.16      | -0.06     | 8.36**     | 8.03***    |
| US output reliance                | 0.20          | 3.97**    | -1.90*    | -2.38***  | 3.53**    | 1.42       | 1.13       |
| Sales                             | -0.85         | 14.43***  | -0.37     | -13.34*** | 10.07**   | 5.22**     | 4.97**     |
| Sample size                       | 2418          |           |           |           | 3627      | 2418       | 3627       |

Notes: All estimates are first differences from a multinomial logistic regression; changes in continuous variables are from median to 90th percentile except for the comparative advantage proxy, which is 10th percentile to median. \*\*\*  $p < 0.01$ , \*\*  $p < 0.05$ , \*  $p < 0.10$ .

Table E2: Replication of Table 5 excluding Russia and China PNTR, and the Free Trade Agreement of the Americas; and then additionally excluding the FTAs with Middle Eastern states and Singapore.

|                                   | Firms take<br>positions only | Assocs. take<br>positions only | Firms<br>lobby only | Association(s)<br>lobby only | Both<br>lobby |
|-----------------------------------|------------------------------|--------------------------------|---------------------|------------------------------|---------------|
| Homogeneous → Mod. differentiated | -6.32**                      | -6.62                          | -2.22               | 0.30                         | 10.77***      |
| Homogeneous → Differentiated      | 18.39***                     | -34.34***                      | 12.07**             | -8.63***                     | 14.29***      |
| Import-competing → Balanced trade | 17.99***                     | -2.27                          | 9.26**              | -4.90**                      | -10.59***     |
| Balanced trade → Export-competing | -7.39                        | 2.27                           | -5.73               | 0.90                         | 3.14          |
| FDI potential                     | -8.21***                     | -6.96***                       | -3.32               | -3.76***                     | 4.27*         |
| US input reliance                 | 3.70                         | -11.24***                      | 5.64**              | -2.81***                     | -3.47**       |
| US output reliance                | 3.71**                       | -2.49***                       | -1.44*              | -0.04                        | 1.82**        |
| Sales                             | 6.64**                       | -11.97***                      | 8.31***             | -2.58***                     | 9.94***       |
| Sample size                       | 1352                         | 1352                           | 1447                | 1447                         | 1447          |

Notes: All estimates are first differences from logistic regression models; changes in continuous variables are from median to 90th percentile except for the comparative advantage proxy, which is 10th percentile to median. \*\*\*  $p < 0.01$ , \*\*  $p < 0.05$ , \*  $p < 0.10$ .

Table E3: Replication of Table 5 excluding Russia and China PNTR, and the Free Trade Agreement of the Americas.



|                                   | Firms take positions only | Assocs. take positions only | Firms lobby only | Association(s) lobby only | Both lobby |
|-----------------------------------|---------------------------|-----------------------------|------------------|---------------------------|------------|
| Homogeneous → Mod. differentiated | -3.11                     | -6.69                       | -2.32            | -0.33                     | 10.86***   |
| Homogeneous → Differentiated      | 20.69***                  | -35.71***                   | 12.50**          | -11.81***                 | 14.79***   |
| Import-competing → Balanced trade | 16.86***                  | -0.91                       | 8.10**           | -1.29                     | -12.19***  |
| Balanced trade → Export-competing | -4.21                     | 1.33                        | -5.51            | -0.36                     | 3.57       |
| FDI potential                     | -12.30***                 | -4.35*                      | -3.58            | -2.72***                  | 4.14*      |
| US input reliance                 | 4.07                      | -8.05***                    | 4.14             | -0.24                     | -4.44***   |
| US output reliance                | 3.48**                    | -2.51**                     | -1.44*           | 0.00                      | 1.83**     |
| Sales                             | 2.30                      | -11.51***                   | 8.58***          | -2.85***                  | 10.36***   |
| Sample size                       | 1122                      | 1122                        | 1405             | 1405                      | 1405       |

Notes: All estimates are first differences from logistic regression models; changes in continuous variables are from median to 90th percentile except for the comparative advantage proxy, which is 10th percentile to median. \*\*\*  $p < 0.01$ , \*\*  $p < 0.05$ , \*  $p < 0.10$ .

Table E4: Replication of Table 5 excluding Russia and China PNTR, and the Free Trade Agreement of the Americas; and then additionally excluding the FTAs with Middle Eastern states and Singapore.

## Appendix F: Random Intercept Models

|                            | All                |                    |                    | KORUS/AUSFTA        |                     |                     |
|----------------------------|--------------------|--------------------|--------------------|---------------------|---------------------|---------------------|
| (Intercept)                | -9.93***<br>(0.71) | -9.96***<br>(0.90) | -5.42***<br>(1.06) | -14.54***<br>(1.95) | -13.50***<br>(2.31) | -13.26***<br>(3.31) |
| diffMod. differentiated    | 0.86***<br>(0.27)  | 1.30***<br>(0.31)  | 1.26***<br>(0.35)  | 1.26*<br>(0.69)     | 1.08<br>(0.79)      | 1.79*<br>(1.05)     |
| diffDifferentiated         | 1.35***<br>(0.26)  | 1.65***<br>(0.30)  | 2.19***<br>(0.35)  | 1.92***<br>(0.66)   | 1.42*<br>(0.77)     | 2.56**<br>(1.08)    |
| ca                         | 0.33***<br>(0.06)  | 0.35***<br>(0.07)  | 0.34***<br>(0.08)  | 0.70***<br>(0.17)   | 0.59***<br>(0.19)   | 0.54**<br>(0.28)    |
| log(fdi1)                  | 0.07***<br>(0.01)  | -0.00<br>(0.02)    | -0.05**<br>(0.02)  | -0.02<br>(0.04)     | -0.16***<br>(0.05)  | -0.52***<br>(0.08)  |
| log(totusinpfor + 1)       | 0.09***<br>(0.02)  | 0.16***<br>(0.02)  | 0.23***<br>(0.02)  | 0.12**<br>(0.06)    | 0.18**<br>(0.07)    | 0.18*<br>(0.10)     |
| log(totusoutfor + 1)       | 0.01<br>(0.01)     | 0.03***<br>(0.01)  | 0.03**<br>(0.01)   | 0.01<br>(0.02)      | 0.05**<br>(0.02)    | 0.04<br>(0.03)      |
| log(sales)                 | 0.29***<br>(0.03)  | 0.23***<br>(0.04)  | -0.02<br>(0.05)    | 0.49***<br>(0.10)   | 0.42***<br>(0.12)   | 0.45***<br>(0.17)   |
| diffMod. differentiated:ca | -0.32***<br>(0.08) | -0.40***<br>(0.08) | -0.35***<br>(0.09) | -0.57***<br>(0.20)  | -0.49**<br>(0.22)   | -0.52*<br>(0.31)    |
| diffDifferentiated:ca      | -0.43***<br>(0.07) | -0.53***<br>(0.08) | -0.56***<br>(0.09) | -0.84***<br>(0.20)  | -0.73***<br>(0.22)  | -0.71**<br>(0.32)   |
| Random intercepts          | None               | 3-digit            | 4-digit            | None                | 3-digit             | 4-digit             |
| Sample size                |                    | 4836               |                    |                     | 806                 |                     |

Notes: \*\*\*  $p < 0.01$ , \*\*  $p < 0.05$ , \*  $p < 0.10$ .

Table F1: Replication of models in Table 3 with random intercepts at the 3- and 4-digit NAICS levels.

|                         | All                |                     |                    | KORUS/AUSFTA        |                     |                     |
|-------------------------|--------------------|---------------------|--------------------|---------------------|---------------------|---------------------|
| (Intercept)             | -7.88***<br>(2.53) | -11.83***<br>(3.06) | -6.95*<br>(4.09)   | -20.25***<br>(3.68) | -20.28***<br>(4.08) | -19.37***<br>(6.19) |
| diffMod. differentiated | 1.25*<br>(0.65)    | 1.61**<br>(0.72)    | 2.42*<br>(1.39)    | 1.85**<br>(0.88)    | 1.94**<br>(0.94)    | 2.84<br>(1.77)      |
| diffDifferentiated      | 1.62**<br>(0.64)   | 1.53**<br>(0.76)    | 2.08<br>(1.40)     | 2.36***<br>(0.90)   | 2.11**<br>(0.98)    | 2.07<br>(1.84)      |
| ca                      | -1.41***<br>(0.40) | -1.36***<br>(0.44)  | -1.38***<br>(0.52) | -0.98**<br>(0.49)   | -1.05*<br>(0.55)    | -0.51<br>(0.85)     |
| I(ca <sup>2</sup> )     | 0.20***<br>(0.07)  | 0.18**<br>(0.08)    | 0.19**<br>(0.09)   | 0.12<br>(0.09)      | 0.12<br>(0.10)      | 0.03<br>(0.16)      |
| log(fdi1)               | -0.13**<br>(0.05)  | -0.10<br>(0.07)     | -0.18**<br>(0.08)  | -0.12*<br>(0.06)    | -0.09<br>(0.10)     | -0.24<br>(0.17)     |
| log(totusinpfor + 1)    | 0.12*<br>(0.07)    | 0.15*<br>(0.08)     | 0.26***<br>(0.10)  | -0.16<br>(0.15)     | -0.29<br>(0.19)     | 0.20<br>(0.30)      |
| log(totusoutfor + 1)    | 0.06**<br>(0.03)   | 0.05*<br>(0.03)     | 0.05<br>(0.04)     | 0.06*<br>(0.03)     | 0.06*<br>(0.04)     | 0.07<br>(0.06)      |
| log(sales)              | 0.19<br>(0.12)     | 0.32**<br>(0.14)    | -0.02<br>(0.19)    | 0.76***<br>(0.20)   | 0.83***<br>(0.24)   | 0.32<br>(0.36)      |
| country2Other           | -3.07***<br>(0.23) | -3.56***<br>(0.27)  | -4.07***<br>(0.32) |                     |                     |                     |
| countryKorea            |                    |                     |                    | 2.73***<br>(0.55)   | 3.14***<br>(0.64)   | 4.08***<br>(1.01)   |
| Random intercepts       | None               | 3-digit             | 4-digit            | None                | 3-digit             | 4-digit             |
| Sample size             |                    | 4836                |                    |                     | 806                 |                     |

Notes: \*\*\*  $p < 0.01$ , \*\*  $p < 0.05$ , \*  $p < 0.10$ .

Table F2: Replication of some of the models in Table 4 with random intercepts at the 3- and 4-digit NAICS levels. This table uses all logistic regression models, with 'Divisions' as the outcome variable.

|                         | All                 |                     |                     | KORUS/AUSFTA        |                     |                     |
|-------------------------|---------------------|---------------------|---------------------|---------------------|---------------------|---------------------|
| (Intercept)             | -12.81***<br>(1.73) | -13.15***<br>(2.14) | -11.92***<br>(2.47) | -14.04***<br>(2.22) | -12.54***<br>(2.61) | -12.05***<br>(3.46) |
| diffMod. differentiated | 0.35<br>(0.35)      | 0.50<br>(0.44)      | 0.47<br>(0.59)      | 0.36<br>(0.42)      | 0.31<br>(0.48)      | 0.16<br>(0.69)      |
| diffDifferentiated      | 0.75**<br>(0.33)    | 0.30<br>(0.46)      | 0.77<br>(0.59)      | 0.62<br>(0.41)      | 0.22<br>(0.50)      | 0.26<br>(0.72)      |
| ca                      | 0.38<br>(0.29)      | 0.57*<br>(0.32)     | 0.87**<br>(0.36)    | 0.29<br>(0.36)      | 0.19<br>(0.40)      | 0.62<br>(0.54)      |
| I(ca <sup>2</sup> )     | -0.11**<br>(0.05)   | -0.14**<br>(0.06)   | -0.19***<br>(0.06)  | -0.11<br>(0.07)     | -0.10<br>(0.07)     | -0.19*<br>(0.10)    |
| log(fdi1)               | 0.17***<br>(0.03)   | 0.24***<br>(0.04)   | 0.26***<br>(0.05)   | 0.09**<br>(0.04)    | 0.08<br>(0.06)      | 0.09<br>(0.10)      |
| log(totusinpfor + 1)    | -0.11***<br>(0.04)  | -0.19***<br>(0.05)  | -0.20***<br>(0.05)  | 0.19**<br>(0.08)    | 0.14<br>(0.10)      | 0.32**<br>(0.14)    |
| log(totusoutfor + 1)    | 0.02<br>(0.02)      | 0.03<br>(0.02)      | 0.02<br>(0.03)      | 0.02<br>(0.02)      | 0.05**<br>(0.02)    | 0.04<br>(0.03)      |
| log(sales)              | 0.55***<br>(0.08)   | 0.61***<br>(0.10)   | 0.53***<br>(0.11)   | 0.37***<br>(0.12)   | 0.33**<br>(0.14)    | 0.13<br>(0.20)      |
| country2Other           | -3.41***<br>(0.17)  | -3.89***<br>(0.19)  | -4.55***<br>(0.24)  |                     |                     |                     |
| countryKorea            |                     |                     |                     | 0.96***<br>(0.23)   | 1.19***<br>(0.28)   | 1.64***<br>(0.38)   |
| Random intercepts       | None                | 3-digit             | 4-digit             | None                | 3-digit             | 4-digit             |
| Sample size             |                     | 4836                |                     |                     | 806                 |                     |

Notes: \*\*\*  $p < 0.01$ , \*\*  $p < 0.05$ , \*  $p < 0.10$ .

Table F3: Replication of some of the models in Table 4 with random intercepts at the 3- and 4-digit NAICS levels. This table uses all logistic regression models, with 'Both happy' as the outcome variable.

| Outcome:                | Firm positions only |                    |                    | Association positions only |                    |                    |
|-------------------------|---------------------|--------------------|--------------------|----------------------------|--------------------|--------------------|
| (Intercept)             | -8.85***<br>(1.45)  | -1.05<br>(2.01)    | -4.30*<br>(2.55)   | 15.30***<br>(1.19)         | 9.56***<br>(1.55)  | 7.31***<br>(1.83)  |
| diffMod. differentiated | -0.57<br>(0.36)     | -0.00<br>(0.60)    | 0.51<br>(0.69)     | -0.43*<br>(0.22)           | -0.10<br>(0.31)    | -0.11<br>(0.37)    |
| diffDifferentiated      | 1.45***<br>(0.30)   | 1.76***<br>(0.60)  | 2.15***<br>(0.74)  | -1.53***<br>(0.22)         | -0.44<br>(0.32)    | -0.63<br>(0.40)    |
| ca                      | 0.64**<br>(0.25)    | 0.73***<br>(0.28)  | 0.78**<br>(0.33)   | 0.03<br>(0.19)             | 0.26<br>(0.21)     | 0.07<br>(0.24)     |
| I(ca <sup>2</sup> )     | -0.09**<br>(0.04)   | -0.11**<br>(0.05)  | -0.12**<br>(0.06)  | 0.00<br>(0.03)             | -0.03<br>(0.04)    | -0.00<br>(0.04)    |
| log(fdi1)               | -0.12***<br>(0.03)  | -0.16***<br>(0.04) | -0.12***<br>(0.04) | -0.04<br>(0.02)            | 0.02<br>(0.03)     | 0.10***<br>(0.04)  |
| log(totusinfor + 1)     | 0.08*<br>(0.04)     | 0.05<br>(0.05)     | -0.03<br>(0.06)    | -0.02<br>(0.03)            | -0.01<br>(0.04)    | -0.13***<br>(0.04) |
| log(totusoutfor + 1)    | 0.06***<br>(0.02)   | 0.05**<br>(0.02)   | -0.01<br>(0.03)    | -0.03**<br>(0.01)          | -0.04***<br>(0.01) | -0.03<br>(0.02)    |
| log(sales)              | 0.15**<br>(0.07)    | -0.19**<br>(0.09)  | 0.01<br>(0.11)     | -0.58***<br>(0.06)         | -0.37***<br>(0.07) | -0.20**<br>(0.09)  |
| Random intercepts       | None                | 3-digit            | 4-digit            | None                       | 3-digit            | 4-digit            |
| Sample size             | 1845                |                    |                    |                            |                    |                    |

Notes: All estimates are first differences from a multinomial logistic regression; changes in continuous variables are from median to 90th percentile except for the comparative advantage proxy, which is 10th percentile to median.  
\*\*\*  $p < 0.01$ , \*\*  $p < 0.05$ , \*  $p < 0.10$ .

Table F4: Replication of some of the models in Table 5 with random intercepts at the 3- and 4-digit NAICS levels.

| Outcome:                | Firms lobby only   |                    |                    | Associations lobby only |                   |                    | Firms and assoc. lobby |                     |                    |
|-------------------------|--------------------|--------------------|--------------------|-------------------------|-------------------|--------------------|------------------------|---------------------|--------------------|
| (Intercept)             | -9.28***<br>(1.34) | -0.72<br>(1.70)    | -4.08**<br>(1.97)  | 10.14***<br>(1.61)      | 3.42<br>(2.34)    | -1.14<br>(2.80)    | -10.60***<br>(1.57)    | -12.62***<br>(1.91) | -8.37***<br>(2.16) |
| diffMod. differentiated | -0.14<br>(0.27)    | -1.06***<br>(0.37) | -0.58<br>(0.41)    | 0.03<br>(0.25)          | 0.70*<br>(0.36)   | -0.16<br>(0.64)    | 1.51***<br>(0.37)      | 0.64<br>(0.44)      | 0.75<br>(0.47)     |
| diffDifferentiated      | 0.63***<br>(0.24)  | -0.54<br>(0.37)    | 0.31<br>(0.41)     | -0.77***<br>(0.24)      | 0.05<br>(0.42)    | -1.58**<br>(0.70)  | 1.79***<br>(0.36)      | 0.90**<br>(0.45)    | 1.05**<br>(0.49)   |
| ca                      | 0.59**<br>(0.24)   | 0.40<br>(0.26)     | 0.24<br>(0.29)     | -0.54**<br>(0.27)       | -0.19<br>(0.33)   | -0.18<br>(0.39)    | -0.68***<br>(0.26)     | -0.53*<br>(0.28)    | -0.39<br>(0.30)    |
| I(ca <sup>2</sup> )     | -0.09**<br>(0.04)  | -0.07*<br>(0.04)   | -0.04<br>(0.05)    | 0.08*<br>(0.04)         | 0.03<br>(0.05)    | 0.03<br>(0.06)     | 0.10**<br>(0.04)       | 0.08*<br>(0.05)     | 0.06<br>(0.05)     |
| log(fdi1)               | -0.03<br>(0.03)    | -0.14***<br>(0.03) | -0.15***<br>(0.04) | -0.13***<br>(0.04)      | -0.01<br>(0.05)   | 0.06<br>(0.05)     | 0.07**<br>(0.03)       | 0.04<br>(0.04)      | 0.03<br>(0.04)     |
| log(totusinpfor + 1)    | 0.06<br>(0.04)     | 0.09*<br>(0.05)    | 0.10*<br>(0.05)    | 0.01<br>(0.05)          | 0.04<br>(0.05)    | 0.02<br>(0.06)     | -0.12***<br>(0.04)     | -0.05<br>(0.05)     | -0.04<br>(0.05)    |
| log(totusoutfor + 1)    | -0.02*<br>(0.01)   | -0.02<br>(0.01)    | -0.04**<br>(0.02)  | 0.01<br>(0.02)          | -0.04*<br>(0.02)  | -0.10***<br>(0.04) | 0.04**<br>(0.02)       | 0.04**<br>(0.02)    | 0.05*<br>(0.03)    |
| log(sales)              | 0.28***<br>(0.07)  | -0.08<br>(0.08)    | 0.04<br>(0.10)     | -0.46***<br>(0.08)      | -0.27**<br>(0.11) | -0.00<br>(0.13)    | 0.42***<br>(0.07)      | 0.45***<br>(0.09)   | 0.23**<br>(0.10)   |
| Random intercepts       | None               | 3-digit            | 4-digit            | None                    | 3-digit           | 4-digit            | None                   | 3-digit             | 4-digit            |
| Sample size             |                    |                    |                    |                         | 1499              |                    |                        |                     |                    |

Notes: All estimates are first differences from a multinomial logistic regression; changes in continuous variables are from median to 90th percentile except for the comparative advantage proxy, which is 10th percentile to median. \*\*\* $p < 0.01$ , \*\* $p < 0.05$ , \* $p < 0.10$ .

Table F5: Replication of some of the models in Table 5 with random intercepts at the 3- and 4-digit NAICS levels.

## References

- Broda, Christian and David Weinstein. 2006. Globalization and the Gains from Variety. *The Quarterly Journal of Economics* 121, no. 2: 541–585.
- Fontagné, Lionel and Michael Freudenberg. 1997. *Intra-Industry Trade: Methodological Issues Reconsidered*, volume 97. Paris: CEPII.
- Gaulier, Guillaume and Soledad Zignago. 2010. BACI: International Trade Database at the Product-level.
- Hedblad, Alan. 2003. *Encyclopedia of Associations: An Associations Unlimited Reference*, volume 1. Gale Research Company.
- Manger, Mark. 2014. The Economic Logic of Asian preferential Trade Agreements: The Role of Intra-industry Trade. *Journal of East Asian Studies* 14, no. 2: 151–184.
- Rauch, James. 1999. Networks Versus Markets in International Trade. *Journal of International Economics* 48, no. 1: 7–35.
